# 1 Utility of Cerebrospinal Fluid Protein Levels as a Potential 2 Predictive Biomarker of Disease Severity in HIV-Associated 3 Cryptococcal Meningitis.

4 John Kasibante<sup>1</sup>, Eesha Irfanullah<sup>2</sup>, Abduljewad Wele<sup>2</sup>, Elizabeth Okafor<sup>2</sup>, Kenneth  
5 Ssebambulidde<sup>1</sup>, Samuel Okurut<sup>1</sup>, Enock Kagimu<sup>1</sup>, Jane Gakuru<sup>1</sup>, Morris K. Rutakingirwa<sup>1</sup>,  
6 Timothy Mugabi<sup>1</sup>, Edwin Nuwagira<sup>3</sup>, Samuel Jjunju<sup>1</sup>, Edward Mpoza<sup>1</sup>, Lillian Tugume<sup>1</sup>, Laura  
7 Nsangi<sup>1</sup>, Abdu K Musibire<sup>1</sup>, Conrad Muzoora<sup>3</sup>, Joshua Rhein<sup>2</sup>, David B. Meya<sup>1,2</sup>, David R.  
8 Boulware<sup>2</sup>, Mahsa Abassi<sup>2</sup>

9 <sup>1</sup> Infectious Diseases Institute, College of health sciences, Makerere University. P.O. Box 22418,  
10 Kampala, Uganda.

11 <sup>2</sup> Division of Infectious Diseases & International Medicine, Department of Medicine, University  
12 of Minnesota, Minneapolis, MN 55455, USA.

13 <sup>3</sup> Department of Medicine, Mbarara University of Science and Technology, P.O Box 1410,  
14 Mbarara, Uganda.

15 **Corresponding author:** John Kasibante, email: [johnkasi93@gmail.com](mailto:johnkasi93@gmail.com), [jkasibante@idi.co.ug](mailto:jkasibante@idi.co.ug)

16 **Author contributions:** JK conceptualized and developed the initial manuscript draft. EI  
17 contributed towards the initial manuscript writing. AW did the statistical analysis. MA, DRB,  
18 and DBM mentored JK and EI. All other authors offered comments and edited the manuscript for  
19 critical input.

20  
21 **Keywords:** HIV; cryptococcal meningitis; cerebral spinal fluid; CSF protein; CSF cytokines;  
22 predictive biomarker.

*Kasibante CSF Protein in Cryptococcosis*

23 **Abstract**

24 **Background.**

25 Cerebrospinal fluid (CSF) protein levels exhibit high variability in HIV-associated cryptococcal  
26 meningitis from being normal to markedly elevated. However, the clinical implications of CSF  
27 protein levels in cryptococcal meningitis remain unclear.

28 **Methods.**

29 We analysed data from 890 adults with HIV-associated cryptococcal meningitis randomized into  
30 two clinical trials in Uganda between 2015 and 2021. CSF protein was grouped into  $\geq 100$  mg/dL  
31 ( $n=249$ ) and  $<100$  mg/dL ( $n=641$ ). We described baseline clinical variables and mortality by  
32 CSF protein levels.

33 **Results.**

34 Approximately one-third of individuals had a baseline CSF protein  $\geq 100$  mg/dL. Those with CSF  
35 protein  $\geq 100$  mg/dL were more likely to present with Glasgow coma scale scores  $<15$  ( $P<0.01$ ),  
36 self-reported seizures at baseline ( $P=0.02$ ), higher CD4 T-cells ( $p<0.001$ ), and higher CSF white  
37 cells ( $p<0.001$ ). Moreover, those with a baseline CSF protein  $\geq 100$  mg/dL also had a lower  
38 baseline CSF fungal burden ( $p<0.001$ ) and a higher percentage of sterile CSF cultures at day 14  
39 ( $p=0.02$ ). Individuals with CSF protein  $\geq 100$  mg/dL demonstrated a more pronounced immune  
40 response consisting of upregulation of immune effector molecules pro-inflammatory cytokines,  
41 type-1 T-helper cell cytokines, type-3 chemokines, and immune-exhaustion marker ( $p<0.05$ ). 18-  
42 week mortality risk in individuals with a CSF protein  $<100$  mg/dL was 34% higher, (unadjusted  
43 Hazard Ratio 1.34; 95% CI, 1.05 to 1.70;  $p=0.02$ ) than those with  $\geq 100$  mg/dL.

*Kasibante CSF Protein in Cryptococcosis*

44 **Conclusion.**

45 In cryptococcal meningitis, individuals with CSF protein  $\geq 100$  mg/dL more frequently presented  
46 with seizures, altered mental status, immune activation, and favourable fungal outcomes.  
47 Baseline CSF protein levels may serve as a surrogate marker of immune activation and  
48 prognosis.

## 49 **Background.**

50 Sub-Saharan Africa is home to an estimated 20.1 million of the 38.4 million people living  
51 with HIV (PLWH) globally [1]. Since 2010, increased access to HIV testing, antiretroviral  
52 therapy (ART), and improved management of opportunistic infections has decreased HIV-  
53 associated mortality by 47% [1]. Despite advancements in HIV care and management, HIV-  
54 associated opportunistic infections remain a significant burden in sub-Saharan Africa, where  
55 54% of cryptococcal meningitis and 63% of all cryptococcal-related mortality occur [2].  
56 Cryptococcal meningitis mortality, even in the setting of clinical trials, remains unacceptably  
57 high, with 10-week mortality exceeding 25% [3, 4]. Therefore, there is a need to identify and  
58 understand the role of predictive biomarkers of cryptococcal meningitis severity to inform  
59 targeted interventions and improve outcomes.

60 Cerebrospinal fluid (CSF) proteins are characterized by marked intra-individual and  
61 inter-individual variability in healthy individuals with approximately 80% of protein originating  
62 from blood and 20% from the central nervous system [5]. Elevated CSF protein therefore  
63 indicates either a dysfunction in the blood-CSF or the blood-brain barrier [6]. In healthy  
64 individuals, CSF protein levels range between 15 and 60 mg/dL. In cryptococcal meningitis, CSF  
65 protein levels are highly variable, ranging from normal levels to as high as >20 times the upper  
66 limit of normal [6, 7]. In 1974, Diamond and Bennet found that in cryptococcal meningitis,  
67 baseline CSF protein levels were higher in persons who survived compared to those who died  
68 [8]. In two recent small retrospective studies, individuals with cryptococcal meningitis and high  
69 baseline CSF protein had a better response to antifungal therapy and improvement in clinical  
70 symptoms compared to those with lower baseline CSF protein levels [7, 9]. While existing data

### *Kasibante CSF Protein in Cryptococcosis*

71 offers intriguing insights into the relationship between baseline CSF protein levels and outcomes  
72 in cryptococcal meningitis, it is crucial to acknowledge that the current evidence remains limited  
73 and inconclusive.

74 Our study aims to enhance our understanding of the role of CSF protein in cryptococcal  
75 meningitis and to assesses its potential as a predictive biomarker of severity in HIV-associated  
76 cryptococcal meningitis. Additionally, we sought to investigate the relationship between CSF  
77 protein levels with established risk factors of severe disease, such as seizures, altered mental  
78 status, CD4 T-cell count, CSF fungal burden, CSF opening pressure, and CSF cytokine profile  
79 [10-12]. Furthermore, we examined the predictive value of elevated CSF protein as a predictor of  
80 mortality.

## 81 **Methods**

### 82 **Study Design**

83 We carried out a prospective cohort study of Ugandans adults diagnosed with HIV-  
84 associated cryptococcal meningitis as a secondary analysis of two randomized clinical trials: (i)  
85 the Adjunctive Sertraline for the Treatment of HIV-associated Cryptococcal Meningitis  
86 (ASTRO-cm) trial enrolled from March 9, 2015, to May 29, 2017; and (ii) the AMBIsome  
87 Therapy Induction Optimisation (AMBITION-cm) trial enrolled from January 2018 through  
88 February 2021 [3, 4]. A detailed description of the study design for each clinical trial is  
89 published elsewhere [4, 13]. In brief, the ASTRO-cm trial investigated the impact of adjunctive  
90 sertraline on cryptococcal meningitis treatment outcomes. The AMBITION-cm trial investigated  
91 the efficacy of single high-dose liposomal amphotericin B on fluconazole and flucytosine

It is made available under a [CC-BY 4.0 International license](https://creativecommons.org/licenses/by/4.0/) .

### *Kasibante CSF Protein in Cryptococcosis*

92 backbone in cryptococcal meningitis. Participants were recruited and enrolled at Mulago  
93 National Specialist Hospital, Kiruddu National Referral Hospital, and Mbarara Regional Referral  
94 Hospital in Uganda. All participants diagnosed with a first episode of HIV-associated  
95 cryptococcal meningitis by a positive finger stick and CSF cryptococcal antigen (CrAg) were  
96 included in this analysis [14, 15]. All study participants had a diagnostic LP performed at  
97 baseline. CSF samples were collected and sent to the laboratory and analysed for CSF cell  
98 counts, quantitative fungal cultures, and protein concentration.

99 Ethical approvals for both clinical trials were granted from the Mulago Hospital Research  
100 and Ethics Committee, the Uganda National Council of Science & Technology, and the  
101 University of Minnesota Institutional Review Board. All participants or their surrogate provided  
102 their written consent for study participation.

### 103 **Cytokine quantification**

104 We assessed CSF cytokine and chemokine concentrations at baseline among a subset of  
105 the ASTRO-CM study participants. CSF samples were centrifuged at 400g for 4 minutes at 4°C,  
106 supernatant was collected and stored at -80°C. Frozen samples were transported to the University  
107 of Minnesota and cytokines/chemokines were measured using the Human Luminex Discovery  
108 Assay (R&D systems, Minneapolis, MN, USA). The 43 cytokine and chemokine assay included  
109 **mediators of inflammatory response**: interleukin (IL) -1a, IL-1b, IL-6, platelet derived growth  
110 factor (PDGF)-AA, PDGF-AB, and vascular endothelial growth factor (VEGF); **type-1 T helper**  
111 **cell (Th1) associated cytokines**: macrophage inflammatory protein (MIP)1a/CCL3,  
112 MIP1b/CCL4, RANTES/CCL5, tumor necrosis factor (TNF)-  $\alpha$ , IL-12, IL-15, interferon (IFN)-  
113  $\gamma$ , interferon-inducible protein (IP)-10/CXCL10, granulocyte-macrophage colony stimulating

It is made available under a [CC-BY 4.0 International license](https://creativecommons.org/licenses/by/4.0/) .

### *Kasibante CSF Protein in Cryptococcosis*

114 factor (GM-CSF), and granzyme B; **Th2 cytokines**: IL-4, IL-5, IL-13, IL-25, IL-33, and eotaxin;  
115 **Th3 cytokines**: MIP3a/CCL20, growth-related oncogene (GRO)- $\alpha$ /CXCL1, GRO- $\beta$ /CXCL2,  
116 CXCL8/IL-8, IL-17A, and granulocyte colony stimulating factor (G-CSF); **modulators of**  
117 **immune response**: IL-10, IL-1 receptor antagonist (IL-1ra), Endothelial growth factor (EGF),  
118 and transforming growth factor (TGF)- $\alpha$ ; **immune exhaustion**: programmed death ligand-1 (PD-  
119 L1), **Type-1 interferon- $\alpha$**  and interferon- $\beta$ , and **non-classified chemokines**: MIP3b/CCL19, IL-  
120 3, CD40 ligand/TNFSF5, fractalkine/CX3CL1, Flt3 ligand,

## 121 **Statistical methods**

122 We initially divided patients into tertiles: low CSF protein (0 to < 45 mg/dL), middle  
123 CSF protein ( $\geq 45$  mg/dL to <100 mg/dL), and high CSF protein ( $\geq 100$  mg/dL). We found no  
124 significant difference between the low and middle tertile groups in terms of survival, and  
125 therefore we combined them into an aggregate CSF protein group of <100 mg/dL. We  
126 summarized baseline demographic variables and laboratory parameters by CSF protein <100  
127 mg/dL vs. CSF protein  $\geq 100$  mg/dL. We also evaluated the impact of ART status at enrollment  
128 on CSF protein levels and its contribution to clinical presentation and outcomes given the role  
129 that ART plays in unmasking immune reconstitution inflammatory syndrome (IRIS). Data are  
130 presented as median with interquartile range (IQR) or proportions with statistical testing via  
131 Kruskal-Wallis's test for medians and Fisher's exact tests for proportions. P values <0.05 were  
132 considered statistically significant. We adjusted cytokine P-values with the Benjamini-Hochberg  
133 procedure to control the false discovery rate [16]. We compared survival by Kaplan-Meier  
134 curves and Cox proportion hazard regression analysis using both the adjusted and unadjusted  
135 models. The adjusted survival model included differentially distributed co-variables between  
136 groups, including CSF opening pressure >250 mmH<sub>2</sub>O, CSF white cell count, seizures, and CSF

*Kasibante CSF Protein in Cryptococcosis*

137 cryptococcal quantitative colony forming units (CFUs). Quantitative CFUs were  $\log_{10}$   
138 transformed for normalization. We conducted all analyses with SAS version 9.4 (SAS Institute,  
139 Cary, NC).

## 140 **Results**

### 141 **Demographics**

142 We included 890 adults with HIV-associated cryptococcal meningitis in our analysis.  
143 72% (641/890) had CSF protein levels  $<100$  mg/dL at baseline. We found no statistically  
144 significant differences in age, gender, and weight at baseline between CSF protein groups “Table  
145 1”. While there was no difference between the percentage of persons who were on ART ( $p=0.82$ )  
146 or the duration of time on ART ( $p=0.05$ ) at baseline, we found a statistically significant higher  
147 CD4 T-cell count in persons with CSF protein  $\geq 100$  mg/dL (median CD4 = 28, IQR 10 to 65  
148 cells/ $\mu$ L) as compared to persons with CSF protein  $<100$  mg/dL (median CD4 = 15, IQR 6 to 41  
149 cells/ $\mu$ L;  $p<0.001$ ). Individuals with CSF protein  $\geq 100$  mg/dL presented with more self-reported  
150 seizures ( $p=0.02$ ) and a Glasgow Coma Scale score  $<15$  ( $p<0.01$ ) compared to those with CSF  
151 protein  $<100$  mg/dL.

152



*Kasibante CSF Protein in Cryptococcosis*

153 **Table 1. Clinical Parameters and Treatment Outcomes by Baseline CSF**  
 154 **Protein Levels**  
 155

|                                                          | N   | CSF Protein<br><100 mg/dL<br>(N = 641) | N   | CSF Protein<br>≥100mg/dL<br>(N = 249) | P-value <sup>1</sup> |
|----------------------------------------------------------|-----|----------------------------------------|-----|---------------------------------------|----------------------|
| Age (years)                                              | 641 | 35 [30, 40]                            | 249 | 35 [30, 42]                           | 0.46                 |
| Female                                                   | 641 | 264 (41)                               | 249 | 87 (35)                               | 0.09                 |
| Weight (kg)                                              | 561 | 50 [46, 60]                            | 224 | 53 [47, 60]                           | 0.26                 |
| <b>Antiretroviral Therapy (ART) Status</b>               |     |                                        |     |                                       |                      |
| Currently on ART                                         | 640 | 307 (48)                               | 249 | 117 (47)                              | 0.82                 |
| Months on ART                                            | 306 | 4 [1, 32]                              | 115 | 3 [1, 13]                             | 0.05                 |
| ≤14 Days                                                 | 306 | 51 (17)                                | 115 | 26 (23)                               | 0.10                 |
| 15-30 Days                                               |     | 37 (12)                                |     | 11 (10)                               |                      |
| 31-90 Days                                               |     | 45 (15)                                |     | 25 (22)                               |                      |
| >90 Days                                                 |     | 173 (57)                               |     | 53 (46)                               |                      |
| <b>Clinical</b>                                          |     |                                        |     |                                       |                      |
| Seizures                                                 | 641 | 92 (14)                                | 249 | 52 (21)                               | <b>0.02</b>          |
| Glasgow Coma Scale <15                                   | 640 | 231 (36)                               | 249 | 114 (46)                              | <b>&lt;0.01</b>      |
| CD4 <50 cells/mm <sup>3</sup> categorical                | 614 | 485 (79)                               | 240 | 158 (66)                              | <b>&lt;0.001</b>     |
| CD4 cells/mm <sup>3</sup>                                | 614 | 15 [6, 41]                             | 240 | 28 [10, 65]                           | <b>&lt;0.001</b>     |
| <b>CSF Opening Pressure mmH<sub>2</sub>O</b>             |     |                                        |     |                                       |                      |
| Baseline                                                 | 590 | 259 [170, 390]                         | 234 | 255 [170, 350]                        | 0.22                 |
| Day 3                                                    | 149 | 300 [196, 420]                         | 54  | 290 [210, 400]                        | 0.77                 |
| Day 7                                                    | 292 | 180 [110, 280]                         | 119 | 180 [100, 268]                        | 0.34                 |
| Day 14                                                   | 223 | 210 [130, 295]                         | 98  | 157[100, 240]                         | <b>&lt;0.01</b>      |
| <b>Quantitative CSF Culture, log<sub>10</sub> CFU/mL</b> |     |                                        |     |                                       |                      |
| Baseline                                                 | 622 | 4.68 [3.2, 5.5]                        | 247 | 4.09 [2.3, 5.3]                       | <b>&lt;0.001</b>     |
| Day 3                                                    | 156 | 4.45 [3.1, 5.2]                        | 60  | 3.48 [2.2, 4.9]                       | <b>0.04</b>          |
| Day 7                                                    | 313 | 1.91 [0.0, 3.6]                        | 131 | 0.00 [0.0, 2.8]                       | <b>&lt;0.01</b>      |
| Day 14                                                   | 245 | 0.00 [0.0, 1.7]                        | 102 | 0.00 [0.0, 1.2]                       | 0.38                 |
| <b>CSF White Cell cells/mm<sup>3</sup></b>               |     |                                        |     |                                       |                      |
| CSF <5 white cells/mm <sup>3</sup>                       | 636 | 460 (72)                               | 246 | 77 (31)                               | <b>&lt;0.001</b>     |
| Baseline                                                 | 636 | <5 [<5, 10]                            | 246 | 53 [<5, 150]                          | <b>&lt;0.001</b>     |
| Day 3                                                    | 159 | <5 [<5, 30]                            | 60  | 28 [<5, 138]                          | <b>&lt;0.001</b>     |
| Day 7                                                    | 312 | <5 [<5, 45]                            | 130 | 35 [<5, 95]                           | <b>&lt;0.001</b>     |
| Day 14                                                   | 248 | <5 [<5, 25]                            | 103 | 25 [<5, 65]                           | <b>&lt;0.001</b>     |
| <b>CSF Sterility status</b>                              |     |                                        |     |                                       |                      |
| Baseline Sterile Culture                                 | 622 | 47 (8)                                 | 247 | 28 (11)                               | 0.08                 |
| Day 14 Sterile Culture                                   | 429 | 191 (45)                               | 149 | 83 (56)                               | <b>0.02</b>          |
| Early Fungicidal Activity, log <sub>10</sub> CFU/mL/d    | 474 | 0.333 (0.186, 0.480)                   | 191 | 0.326 (0.208, 0.482)                  | 0.43                 |

Data are represented as Median [IQR] or N (%)

<sup>1</sup>Kruskal-Wallis test for medians; Fisher Exact tests for proportions

Day 3, 7, and 14 values are collected within +/-1 day within the visit window

*Kasibante CSF Protein in Cryptococcosis*

157 **CSF characteristics**

158 Baseline CSF white cells were significantly higher in individuals with CSF protein  $\geq 100$   
159 mg/dL (median 53, IQR  $< 5$  to 150 white cells/mm<sup>3</sup> CSF) compared to those with CSF protein  
160  $< 100$  mg/dL (median  $< 5$ , IQR  $< 5$  to 10 white cells/mm<sup>3</sup> CSF;  $p < 0.001$ ). CSF white cell counts  
161 remained significantly higher through days 3, 7, and 14 among individuals with CSF protein  
162  $\geq 100$  mg/dL as compared to CSF protein  $< 100$  mg/dL ( $p < .001$ ). Baseline CSF quantitative  
163 cryptococcal cultures were significantly lower in persons with CSF protein  $\geq 100$  mg/dL (median  
164 12 300, IQR 200 to 200 000 CFU/mL) compared to persons with CSF protein  $< 100$  mg/dL  
165 (median 48 000, IQR 1585 to 316 000 CFU/mL;  $p < 0.001$ ). At day 14, the proportion of persons  
166 with a sterile CSF culture was higher in those with CSF protein  $\geq 100$  mg/dL compared to those  
167 with CSF protein  $< 100$  mg/dL (CSF protein  $\geq 100$  mg/dL 56% (83/149) vs. CSF protein  $< 100$   
168 mg/dL 45% (191/429);  $p = 0.02$ ). We found no differences in baseline CSF opening pressure  
169 between individuals with CSF protein  $\geq 100$  mg/dL compared to CSF protein  $< 100$  mg/dL  
170 ( $p = 0.22$ ).

171 CSF cytokine assays revealed that individuals with CSF protein  $\geq 100$  mg/dL had  
172 significantly higher levels of pro-inflammatory cytokines, interleukin(IL)-1 $\beta$ , IL-6, PDGF-AA  
173 and VEGF; type-1 T helper cell (Th1) response cytokines IL-12, IL-15, interferon- $\gamma$ , TNF- $\alpha$ , and  
174 GM-CSF; effector molecules granzyme B and TRAIL; type-2 T helper cell (Th2) response  
175 cytokine IL-5 and Eotaxin; type 3/ Th17 related cytokines IL-17, G-CSF, CXCL1, CXCL2,  
176 CXCL8, and CCL20; and immune exhaustion marker PD-L1; as compared to those with CSF  
177 protein  $< 100$  mg/dL “Table 2”.

178

*Kasibante CSF Protein in Cryptococcosis*

179 **Table 2: Baseline CSF Cytokines and Chemokines by Baseline CSF Protein**  
180 **Levels**

| CSF Biomarker, pg/mL (log2)                                                                                                    | N   | CSF Protein < 100<br>mg/dL<br>Median (IQR) | N  | CSF Protein ≥ 100<br>mg/dL<br>Median (IQR) | P-value* | P-value**     |
|--------------------------------------------------------------------------------------------------------------------------------|-----|--------------------------------------------|----|--------------------------------------------|----------|---------------|
| <b>Mediate inflammatory responses</b>                                                                                          |     |                                            |    |                                            |          |               |
| IL-1a                                                                                                                          | 229 | 3.8 [1.4, 6.8]                             | 84 | 5.4 [2.8, 7.6]                             | 0.0701   | 0.1018        |
| IL-6                                                                                                                           | 229 | 116 [36.7, 733]                            | 84 | 380 [119, 2343]                            | 0.0004   | <b>0.0045</b> |
| IL-1b                                                                                                                          | 229 | 2.4 [1.0, 3.8]                             | 84 | 3.3 [1.9, 5.7]                             | 0.0011   | <b>0.0062</b> |
| PDGF-AA                                                                                                                        | 228 | 81.8 [48.8, 117]                           | 84 | 99.8 [57.6, 174]                           | 0.0069   | <b>0.0141</b> |
| PDGF-AB                                                                                                                        | 229 | 2.6 [0.4, 4.3]                             | 84 | 3.6 [0.8, 5.2]                             | 0.1109   | 0.1426        |
| VEGF                                                                                                                           | 229 | 44.9 [28.7, 75.5]                          | 84 | 59.8 [31.9, 100.0]                         | 0.0166   | <b>0.0311</b> |
| FGF Basic                                                                                                                      | 229 | 1.5 [0.3, 1.5]                             | 84 | 1.5 [0.3, 5.0]                             | 0.0892   | 0.1181        |
| <b>Type 1 T helper cell (Th<sub>1</sub>) immune response, ideal for effective intracellular killing of <i>Cryptococcus</i></b> |     |                                            |    |                                            |          |               |
| IL-12                                                                                                                          | 229 | 5.2 [0.8, 10.0]                            | 84 | 8.0 [3.6, 13.2]                            | 0.0058   | <b>0.0131</b> |
| IL-15                                                                                                                          | 229 | 3.5 [2.4, 5.1]                             | 84 | 3.4 [2.5, 5.0]                             | 0.8414   | 0.8414        |
| Interferon-γ                                                                                                                   | 229 | 4.2 [0.4, 9.5]                             | 84 | 8.3 [1.5, 16.9]                            | 0.0018   | <b>0.0062</b> |
| TNF-α                                                                                                                          | 229 | 40.8 [16.1, 90.9]                          | 84 | 64.3 [29.3, 142.4]                         | 0.0046   | <b>0.0115</b> |
| GM-CSF                                                                                                                         | 229 | 33.7 [22.5, 54.7]                          | 84 | 46.4 [26.8, 81.5]                          | 0.0033   | <b>0.0099</b> |
| Granzyme B                                                                                                                     | 229 | 12.3 [3.5, 21.8]                           | 84 | 21.1 [11.5, 82.1]                          | 0.0000   | <b>0.0000</b> |
| TRAIL                                                                                                                          | 229 | 7.0 [2.5, 12.3]                            | 84 | 10.9 [4.8, 14.9]                           | 0.0017   | <b>0.0064</b> |
| MCP1/CCL2                                                                                                                      | 229 | 831 [497, 2207]                            | 84 | 998 [578, 2265]                            | 0.4399   | 0.4828        |
| MIP1a/CCL3                                                                                                                     | 229 | 36.6 [20.4, 66.5]                          | 84 | 50.6 [29.7, 78.2]                          | 0.0418   | 0.0672        |
| MIP1b/CCL4                                                                                                                     | 229 | 166 [109, 247]                             | 84 | 190 [121, 305]                             | 0.0599   | 0.0899        |
| Rantes/CCL5                                                                                                                    | 137 | 40.8 [4.1, 99.1]                           | 58 | 73.3 [4.1, 143.7]                          | 0.3302   | 0.3715        |
| IP10/CXCL10                                                                                                                    | 229 | 2336 [1027, 2900]                          | 84 | 2568 [1400, 3139]                          | 0.1525   | 0.1855        |
| <b>Type 2 T helper cell (Th<sub>2</sub>) immune response, not protective against <i>Cryptococcus</i></b>                       |     |                                            |    |                                            |          |               |
| IL-4                                                                                                                           | 229 | 1.6 [0.7, 2.6]                             | 84 | 1.5 [0.6, 2.3]                             | 0.6020   | 0.6300        |
| IL-5                                                                                                                           | 229 | 0.9 [<0.1, 3.2]                            | 84 | 2.8 [0.2, 4.7]                             | 0.0001   | <b>0.0023</b> |
| IL-13                                                                                                                          | 229 | 22.3 [13.7, 34.5]                          | 84 | 29.3 [14.5, 38.9]                          | 0.1326   | 0.1658        |
| IL-33                                                                                                                          | 229 | 7.6 [2.0, 13.1]                            | 84 | 10.1 [3.6, 17.1]                           | 0.0762   | 0.1039        |
| IL-25                                                                                                                          | 229 | 17.0 [4.9, 34.9]                           | 84 | 17.7 [7.4, 31.9]                           | 0.7725   | 0.7901        |
| Eotaxin                                                                                                                        | 229 | 14.5 [9.2, 19.9]                           | 84 | 18.2 [11.1, 23.1]                          | 0.0084   | 0.0164        |
| <b>Type 3 immune response, involves neutrophils mediated inflammation</b>                                                      |     |                                            |    |                                            |          |               |
| IL-17A                                                                                                                         | 229 | 2.0 [0.2, 4.4]                             | 84 | 3.9 [0.9, 7.7]                             | 0.0006   | <b>0.0045</b> |
| GCSF                                                                                                                           | 229 | 30.9 [13.2, 68.3]                          | 84 | 45.4 [18.6, 108.2]                         | 0.0222   | <b>0.0400</b> |
| GROa/CXCL1                                                                                                                     | 229 | 144.5 [57.5, 435]                          | 84 | 362 [95.1, 667]                            | 0.0005   | <b>0.0045</b> |
| GROb/CXCL2                                                                                                                     | 229 | 15.2 [6.6, 25.9]                           | 84 | 19.8 [8.5, 43.0]                           | 0.0054   | <b>0.0128</b> |
| IL8/CXCL8                                                                                                                      | 228 | 289 [119, 814]                             | 84 | 584 [269, 1777]                            | 0.0009   | <b>0.0058</b> |
| MIP3a/CCL20                                                                                                                    | 229 | 4.5 [1.3, 8.4]                             | 84 | 6.9 [3.2, 10.5]                            | 0.0017   | <b>0.0070</b> |
| <b>Modulate/dampen all 3 types of immune responses</b>                                                                         |     |                                            |    |                                            |          |               |
| IL-1ra                                                                                                                         | 228 | 4199 [1271, >10000]                        | 84 | 7237 [3590, >10000]                        | 0.0012   | <b>0.0060</b> |
| IL-10                                                                                                                          | 229 | 229 [155, 332]                             | 84 | 263 [176, 393]                             | 0.0524   | 0.0813        |

*Kasibante CSF Protein in Cryptococcosis*

|                                                                                                                   |     |                      |    |                      |        |               |
|-------------------------------------------------------------------------------------------------------------------|-----|----------------------|----|----------------------|--------|---------------|
| IL-2                                                                                                              | 229 | 4.7 [2.3, 8.3]       | 84 | 7.1 [3.3, 10.8]      | 0.0035 | <b>0.0098</b> |
| TGF- $\alpha$                                                                                                     | 229 | 9.3 [5.4, 15.1]      | 84 | 11.5 [5.6, 20.4]     | 0.0384 | 0.0640        |
| EGF                                                                                                               | 229 | 1.3 [0.6, 6.0]       | 84 | 3.2 [0.6, 7.7]       | 0.1937 | 0.2294        |
| <b>Immune exhaustion (with HIV and cryptococcal chronic infections)</b>                                           |     |                      |    |                      |        |               |
| PDL-1                                                                                                             | 229 | 97.9 [51.0, 166.9]   | 84 | 161.5 [67.8, 265.5]  | 0.0004 | <b>0.0060</b> |
| <b>With G-CSF, GM-CSF, stimulate production of immune cells in the bone marrow</b>                                |     |                      |    |                      |        |               |
| IL-3                                                                                                              | 229 | 4.6 [0.7, 15.0]      | 84 | 7.1 [0.7, 17.4]      | 0.2022 | 0.2333        |
| <b>Other cytokines</b>                                                                                            |     |                      |    |                      |        |               |
| MIP3b/CCL19                                                                                                       | 229 | 81.6 [34.4, 175.5]   | 84 | 146.4 [50.3, 273.3]  | 0.0037 | <b>0.0098</b> |
| TNFSF5/CD40-L                                                                                                     | 229 | 384 [65.2, 636]      | 84 | 529 [251, 835]       | 0.0025 | <b>0.0080</b> |
| Fractalkine/CX3CL1                                                                                                | 229 | 292.0 [174.3, 444.5] | 84 | 383.1 [240.6, 596.2] | 0.0015 | <b>0.0068</b> |
| Flt-3Ligand                                                                                                       | 229 | 97.3 [64.0, 141.1]   | 84 | 122.5 [81.4, 171.0]  | 0.0062 | <b>0.0133</b> |
| <b>Type 1 Interferons, generally for anti-viral responses and down regulates Th<sub>1</sub> immune responses.</b> |     |                      |    |                      |        |               |
| Interferon- $\alpha$                                                                                              | 229 | 4.3 [1.9, 9.4]       | 84 | 5.5 [3.0, 9.7]       | 0.0748 | 0.1052        |
| Interferon- $\beta$                                                                                               | 229 | 0.3 [0.1, 2.0]       | 84 | 1.1 [0.2, 2.6]       | 0.0277 | <b>0.0479</b> |

\*P-values from Wilcoxon test.

\*\*Adjusted P value by Benjamini Hochberg procedure to control false discovery rate.

Abbreviations: MIP, Macrophage inflammatory protein; TNF, tumor necrosis factor; GRO, growth-related oncogene; IL-interleukin; IL-1ra, interleukin-1 receptor antagonist; IFN, Interferon; IP-10, interferon-inducible protein; G-CSF, granulocyte colony stimulating factor; GM-CSF, granulocyte-macrophage colony stimulating factor; PDL-1, programmed death ligand-1; EGF, Endothelial growth factor; TGF, transforming growth factor; PDGF, platelet derived growth factor; VEGF, vascular endothelial growth factor.

181

## 182 **Effect of ART on CSF Protein Levels**

183 ART status at study enrolment influenced clinical parameters in both CSF protein

184 categories “Table 3”. Individuals on ART and with a baseline CSF protein  $\geq 100$  mg/dL were

185 more likely to present with a Glasgow coma scale score  $< 15$  as compared to persons on ART and

186 with a baseline CSF protein  $< 100$  mg/dL (98/307 vs. 50/117,  $p < 0.04$ ). There was no difference in

187 Glasgow coma scale score  $< 15$  between CSF protein groups in individuals who were not

188 receiving ART on admission ( $p = 0.10$ ). Persons with a baseline CSF protein  $\geq 100$  mg/dL had a

189 higher CD4 T-cell count, higher CSF white cell count at baseline and through day 14, and a

190 lower baseline CSF fungal burden compared to persons with CSF protein  $< 100$  mg/dL,

191 irrespective of baseline ART status. Individuals on ART with a CSF protein  $\geq 100$  mg/dL had a

192 higher percentage of sterile cultures at day 14 compared to individuals on ART and with a CSF

*Kasibante CSF Protein in Cryptococcosis*

193 protein <100 mg/dL (p<0.01). There was no difference in the percentage of day 14 sterile  
 194 cultures between CSF protein groups in those who were not on ART at baseline (p=0.78).

195 **Table 3: Clinical Presentation and Outcomes by Baseline CSF Protein Levels**  
 196 **and ART Status**

|                                             | Receiving Antiretroviral therapy at Baseline |                                 |     |                                |                      | NOT Receiving Antiretroviral therapy |                                 |     |                                |                      |
|---------------------------------------------|----------------------------------------------|---------------------------------|-----|--------------------------------|----------------------|--------------------------------------|---------------------------------|-----|--------------------------------|----------------------|
|                                             | N                                            | CSF protein < 100 mg/dL (N=307) | N   | CSF protein ≥ 100mg/dL (N=117) | P-value <sup>1</sup> | N                                    | CSF protein < 100 mg/dL (N=333) | N   | CSF protein ≥ 100mg/dL (N=132) | P-value <sup>1</sup> |
| <b>Demographics</b>                         |                                              |                                 |     |                                |                      |                                      |                                 |     |                                |                      |
| Age, years                                  | 307                                          | 35 [30, 40]                     | 117 | 35 [30, 42]                    | 0.35                 | 333                                  | 35 [30, 41]                     | 132 | 35 [30, 42]                    | 0.90                 |
| Female                                      | 307                                          | 134 (44%)                       | 117 | 41 (35%)                       | 0.12                 | 333                                  | 130 (39%)                       | 132 | 46 (35%)                       | 0.46                 |
| Weight, kg                                  | 278                                          | 50 [46, 58]                     | 107 | 52 [46, 59]                    | 0.52                 | 283                                  | 51 [47, 60]                     | 117 | 54 [48, 60]                    | 0.40                 |
| <b>Clinical</b>                             |                                              |                                 |     |                                |                      |                                      |                                 |     |                                |                      |
| Seizures                                    | 307                                          | 37 (12%)                        | 117 | 21 (18%)                       | 0.12                 | 333                                  | 55 (17%)                        | 132 | 31 (24%)                       | 0.09                 |
| Glasgow Coma scale<15                       | 307                                          | 98 (32%)                        | 117 | 50 (43%)                       | <b>0.04</b>          | 332                                  | 132 (40%)                       | 132 | 64 (49%)                       | 0.10                 |
| CD4<50 cells/mm <sup>3</sup>                | 294                                          | 217 (74%)                       | 112 | 59 (53%)                       | <b>&lt;0.01</b>      | 319                                  | 267 (84%)                       | 128 | 99 (77%)                       | 0.13                 |
| CD4, cells/mm <sup>3</sup>                  | 294                                          | 20 [8, 52]                      | 112 | 42 [16, 88]                    | <b>&lt;0.01</b>      | 319                                  | 13 [6, 33]                      | 128 | 19 [8, 45]                     | <b>&lt;0.01</b>      |
| <b>Opening Pressure, mmH<sub>2</sub>O</b>   |                                              |                                 |     |                                |                      |                                      |                                 |     |                                |                      |
| Baseline                                    | 282                                          | 245 [170, 370]                  | 108 | 260 [180, 350]                 | 0.99                 | 307                                  | 270 [170, 400]                  | 126 | 250 [160,340]                  | 0.10                 |
| Day 3                                       | 67                                           | 286 [190, 395]                  | 27  | 268 [180, 400]                 | 0.94                 | 81                                   | 320 [200, 450]                  | 27  | 304 [210,401]                  | 0.69                 |
| Day 7                                       | 136                                          | 180 [120, 262]                  | 57  | 180 [110, 248]                 | 0.52                 | 156                                  | 190 [106, 293]                  | 62  | 185 [90, 280]                  | 0.46                 |
| Day 14                                      | 106                                          | 200 [120, 290]                  | 39  | 150 [100, 240]                 | 0.07                 | 117                                  | 230 [140, 300]                  | 59  | 160 [90, 240]                  | <b>0.01</b>          |
| <b>CSF Culture, log<sub>10</sub> CFU/mL</b> |                                              |                                 |     |                                |                      |                                      |                                 |     |                                |                      |
| Baseline                                    | 299                                          | 4 [2.5, 5.2]                    | 116 | 3 [1.6, 4.6]                   | <b>&lt;0.01</b>      | 322                                  | 5 [3.9, 5.6]                    | 131 | 5 [3.3, 5.5]                   | <b>0.04</b>          |
| Day 3                                       | 73                                           | 4 [1.6, 5.0]                    | 31  | 3 [1.5, 4.7]                   | 0.36                 | 82                                   | 5 [4.0, 5.3]                    | 29  | 4 [2.4, 5.0]                   | 0.06                 |
| Day 7                                       | 146                                          | 2 [0.0, 3.3]                    | 64  | 0 [0.0, 2.1]                   | <b>&lt;0.01</b>      | 167                                  | 2 [0.0, 3.7]                    | 67  | 1 [0.0, 3.2]                   | 0.18                 |
| Day 14                                      | 116                                          | 0 [0.0, 1.6]                    | 40  | 0 [0.0, 1.0]                   | 0.51                 | 129                                  | 0 [0.0, 2.1]                    | 62  | 0 [0.0, 1.4]                   | 0.47                 |
| <b>CSF White cells/mm<sup>3</sup></b>       |                                              |                                 |     |                                |                      |                                      |                                 |     |                                |                      |
| CSF <5 white cells/mm <sup>3</sup>          | 304                                          | 214 (70%)                       | 115 | 29 (25%)                       | <b>&lt;0.01</b>      | 331                                  | 246 (74%)                       | 131 | 48 (37%)                       | <b>&lt;0.01</b>      |
| Baseline                                    | 304                                          | <5 [<5, 18]                     | 115 | 70 [<5, 205]                   | <b>&lt;0.01</b>      | 331                                  | <5 [<5, 5]                      | 131 | 40 [<5, 140]                   | <b>&lt;0.01</b>      |
| Day 3                                       | 73                                           | <5 [<5, 35]                     | 31  | 30 [<5, 120]                   | <b>&lt;0.01</b>      | 85                                   | <5 [<5, 25]                     | 29  | 25 [<5, 240]                   | <b>&lt;0.01</b>      |
| Day 7                                       | 146                                          | <5 [<5, 35]                     | 63  | 40 [<5, 85]                    | <b>&lt;0.01</b>      | 166                                  | <5 [<5, 50]                     | 67  | 30 [<5, 115]                   | <b>&lt;0.01</b>      |
| Day 14                                      | 117                                          | <5 [<5, 30]                     | 41  | <5 [<5, 65]                    | <b>0.04</b>          | 131                                  | <5 [<5, <5]                     | 62  | 28 [<5, 65]                    | <b>&lt;0.01</b>      |
| <b>CSF sterility</b>                        |                                              |                                 |     |                                |                      |                                      |                                 |     |                                |                      |
| Baseline                                    | 299                                          | 34 (11%)                        | 116 | 19 (16%)                       | 0.19                 | 322                                  | 13 (4%)                         | 131 | 9 (7%)                         | 0.23                 |
| Day 14                                      | 212                                          | 101 (48%)                       | 78  | 52 (67%)                       | <b>&lt;0.01</b>      | 216                                  | 89 (41%)                        | 71  | 31 (44%)                       | 0.78                 |
| <b>Mortality</b>                            |                                              |                                 |     |                                |                      |                                      |                                 |     |                                |                      |
| 2 Weeks                                     | 307                                          | 74 (24%)                        | 117 | 22 (19%)                       | 0.30                 | 333                                  | 84 (25%)                        | 132 | 27 (21%)                       | 0.33                 |
| 18 Weeks                                    | 307                                          | 127 (41%)                       | 117 | 42 (36%)                       | 0.32                 | 333                                  | 150 (45%)                       | 132 | 44 (33%)                       | <b>0.02</b>          |

Data are represented as Median [IQR] or N (%)

<sup>1</sup>Kruskal-Wallis test for medians; Fisher Exact tests for proportions

Day 3, 7, and 14 values are collected within +/-1 day within the visit window

197

## 198 Outcomes

199 CSF protein levels influenced survival outcomes. Through 18 weeks, those with a CSF  
 200 protein <100 mg/dL were at a 34% higher risk of death compared to individuals with CSF  
 201 protein ≥100 mg/dl (Hazard Ratio=1.34; 95% CI 1.05 to 1.70; p=0.02) “Table 4, Fig 1a”.

*Kasibante CSF Protein in Cryptococcosis*

202 Adjustment for baseline CSF fungal burden, Glasgow coma scale score <15, CSF white count,  
203 CSF opening pressure, and baseline self-reported seizures, attenuated the 18-week mortality risk  
204 between CSF protein groups (adjusted Hazard Ratio = 1.24; 95%CI, 0.94 to 1.64; p=0.13).  
205 Mortality rates through 18-weeks differed by ART status. Mortality was highest among  
206 individuals who were not on ART and had a baseline CSF protein <100 mg/dL (150/333)  
207 compared to CSF protein  $\geq$ 100 mg/dL (44/132) (p=0.02), while mortality through 18-weeks was  
208 similar in individuals on ART and CSF protein (44/132) (p=0.02) “Fig 1b”.

209 **Table 4. Mortality by Baseline CSF Protein Levels**

|                               |                       | CSF Protein<br>< 100 mg/dL | CSF Protein<br>$\geq$ 100 mg/dL | P-value     |
|-------------------------------|-----------------------|----------------------------|---------------------------------|-------------|
| <b>Deaths within 2 Weeks</b>  | No. Patients          | 641                        | 249                             |             |
|                               | No. (%) with Event    | 159 (25)                   | 49 (20)                         |             |
|                               | Hazard Ratio (95% CI) |                            |                                 |             |
|                               | Unadjusted            | 1.30 (0.95 - 1.80)         | REF                             | 0.10        |
| Adjusted <sup>1</sup>         | 1.15 (0.80 - 1.67)    | REF                        | 0.45                            |             |
| <b>Deaths within 18 Weeks</b> | No. Patients          | 641                        | 249                             |             |
|                               | No. (%) with Event    | 278 (43)                   | 86 (35)                         |             |
|                               | Hazard Ratio (95% CI) |                            |                                 |             |
|                               | Unadjusted            | 1.34 (1.05 - 1.70)         | REF                             | <b>0.02</b> |
| Adjusted <sup>1</sup>         | 1.24 (0.94 - 1.64)    | REF                        | 0.13                            |             |

<sup>1</sup> Adjusted for Baseline CSF quantitative culture log<sub>10</sub> CFU/mL, Glasgow Coma Scale, CSF White Cell, Baseline Opening Pressure, and Seizures

210

211 **Figure 1. Kaplan- Meier curves of 18-week survival by baseline CSF protein**  
212 **levels alone (1a) and by baseline CSF protein levels and ART status (1b).**

213

## 214 Discussion

215 We demonstrate that in cryptococcal meningitis, persons presenting with CSF protein  
216  $\geq$ 100 mg/dL had better overall 18-week survival and more frequently presented with altered  
217 mental status, seizures, higher CSF white cell count, and a lower CSF quantitative cryptococcal

*Kasibante CSF Protein in Cryptococcosis*

218 culture. When stratified by ART status, only individuals receiving ART and a CSF protein  $\geq 100$   
219 mg/dL presented more frequently with altered mental status. Furthermore, CSF protein  $\geq 100$   
220 mg/dL was associated with higher levels of CSF pro-inflammatory, type-1, and type-3 cytokine  
221 response. We found a 34% increased hazard of 18-week mortality among individuals with a  
222 baseline CSF protein  $< 100$  mg/dL as compared to those with CSF protein  $\geq 100$  mg/dL. After  
223 adjusting for CSF fungal burden, Glasgow coma scale score  $< 15$ , CSF white cell count, CSF  
224 opening pressure, and baseline self-reported seizures, the 18-week mortality difference was only  
225 partially attenuated with a remaining 24% increased hazard in mortality that was not statistically  
226 different but unexplained by traditional risk factors. Taken together, these findings suggest that  
227 CSF protein is a possible predictive biomarker of cryptococcal meningitis severity that is easily  
228 accessible at baseline unlike quantitative CSF fungal cultures, which take 7 or more days and are  
229 not performed in most routine clinical care settings.

230 In cryptococcal meningitis, high baseline CSF fungal burden and slow rate of fungal  
231 clearance are independent predictors of increased mortality at 2 and 10 weeks [10, 12, 17].  
232 Baseline CSF fungal burden and rate of fungal clearance are influenced by the degree of cell-  
233 mediated immunity and host inflammatory response in cryptococcal meningitis [18]. Higher  
234 CD4 T-cell count, CSF white cell count, and CSF pro-inflammatory cytokines, IL-6, interferon-  
235  $\gamma$ , and TNF- $\alpha$ , are associated with a lower CSF fungal burden, a more rapid rate of fungal  
236 clearance, and improved survival [11, 18-20]. We found that individuals with a baseline CSF  
237 protein  $\geq 100$  mg/dL presented with a higher CD4 T-cell count and a higher CSF white blood cell  
238 count, suggesting the presence of a robust inflammatory response compared to those with a CSF  
239 protein  $< 100$  mg/dL, even in the absence of ART.



*Kasibante CSF Protein in Cryptococcosis*

240 In murine models of *Cryptococcus neoformans* infection, recruitment of CD4<sup>+</sup> and CD8<sup>+</sup>  
241 leukocytes coincided with CSF cytokine production, white cell recruitment and fungal clearance  
242 [21]. In the current study, individuals with CSF protein  $\geq 100$  mg/dL exhibited a predominantly  
243 pro-inflammatory cytokine response skewed towards type-1 and type-3 T helper cell immune  
244 responses. These individuals also exhibited higher levels of some type-2 T helper cell and  
245 immune-modulatory cytokines; but this was to a lesser extent (<50% of cytokines in these  
246 categories were statistically significant). The elevated levels of chemokines, CXCL1, CXCL2,  
247 CXCL8, and CCL20, responsible for T cells, B cells, dendritic cells, monocytes, and neutrophils  
248 recruitment, would explain the higher CSF white cell count observed in those with CSF protein  
249  $\geq 100$  mg/dL [11, 18, 20, 22-25]. Moreover, we noted increased expression of the immuno-  
250 regulatory cytokines, IL-1ra and IL-2, and the immune exhaustion protein PD-L1, which  
251 suppress activated T-cells, in those with CSF protein  $\geq 100$  mg/dL, suggesting a possible  
252 attenuation of damaging inflammatory effects of activated T-cells [21, 26-28]. The combination  
253 of this cytokine and cellular response, along with the anti-cryptococcal activity of Granzyme B,  
254 likely explains the lower baseline CSF fungal burden and a higher percentage of sterile CSF  
255 cultures at day 14 among individuals with CSF protein  $\geq 100$  mg/dL [18, 29, 30].

256 Cell-mediated immunity plays a crucial role in protecting against the development of  
257 cryptococcal disease and promoting fungal clearance [21, 31]. Deficiency in CD4 T-cells  
258 increases the susceptibility to cryptococcal meningitis and is associated with cryptococcal-related  
259 mortality [31, 32]. While most cases of HIV-associated cryptococcal meningitis occur when CD4  
260 T-cell counts drop below 100 cells/ $\mu$ L, approximately 10-20% of cryptococcosis occurs at higher  
261 CD4 T-cell counts [32]. Higher CD4 T-cell counts are more frequently associated with altered  
262 mental status and lower CSF burden of *Cryptococcus* [32]. Despite low median CD4 T-cell



It is made available under a [CC-BY 4.0 International license](https://creativecommons.org/licenses/by/4.0/) .

*Kasibante CSF Protein in Cryptococcosis*

263 counts in both CSF protein groups, corresponding to advanced HIV disease, individuals with  
264 CSF protein  $\geq 100$  mg/dL had a statistically significant higher baseline CD4 T-cell count,  
265 suggesting the possibility of an enhanced T-cell mediated immune response to *Cryptococcus*.  
266 The enhanced T-cell mediated immune response and presence of increased levels of CSF  
267 cytokines when CSF protein  $\geq 100$  mg/dL may explain the resulting lower baseline CSF fungal  
268 burden, higher percentage of sterile cultures at 2 weeks, as well as the occurrence of altered  
269 mental status and seizures at baseline. Ultimately, additional research is needed to thoroughly  
270 investigate the functionality of CD4 T-cells in the context CSF protein in cryptococcal  
271 meningitis.

272         Despite the higher CSF white cell count, lower CSF fungal burden, and higher levels of  
273 CSF cytokines in individuals with a CSF protein  $\geq 100$  mg/dL, the survival advantage was  
274 negated after adjusting for established risk factors of cryptococcal mortality. Notably, altered  
275 mental status was observed in 46% of individuals with a CSF protein  $\geq 100$  mg/dL at baseline.  
276 We have previously demonstrated that altered mental status in cryptococcosis is most likely  
277 associated with a dysfunctional host immune response [33]. Here, we demonstrate a robust  
278 inflammatory response in individuals with CSF protein  $\geq 100$  mg/dL, characterized by a  
279 predominantly pro-inflammatory cytokine response skewed toward type-1 T helper cell and  
280 type-3 immune responses. Taken together, our findings suggest that individuals with  
281 cryptococcal meningitis presenting with altered mental status and a baseline CSF protein  $\geq 100$   
282 mg/dL may be exhibiting a robust inflammatory response leading to neurologic deterioration and  
283 death [21] . This is consistent with the damage-response framework proposed by Pirofski and  
284 Casadevall, a strong host-mediated inflammatory response during cryptococcal infection can  
285 inflict host damage, neurological impairment, and death [34].

*Kasibante CSF Protein in Cryptococcosis*

286 Our study has several limitations. Our study population consisted of only people living  
287 with HIV and hence may not be generalizable to cases of non-HIV associated cryptococcal  
288 meningitis. We measured CSF cytokine levels only at baseline, and inflammation changes over  
289 time [35]. We recognize that cytokine levels can fluctuate over time, and we may not have  
290 captured the complete dynamics of the immune response in cryptococcal meningitis. We did not  
291 assess serum protein levels, which would have allowed for a better evaluation of the CSF to  
292 serum protein ratio. The ratio provides information about the permeability and integrity of the  
293 blood-brain barrier during meningeal inflammation, which would affect CSF protein level [36].  
294 Lastly, our study combined data from two separate clinical trials which may affect the internal  
295 validity of the study.

296 In conclusion, we have demonstrated that baseline CSF protein levels can serve as a  
297 surrogate marker of immune activation in cryptococcal meningitis and provide valuable  
298 information on disease severity. Individuals with CSF protein  $\geq 100$  mg/dL exhibited a more  
299 robust immune response against cryptococcal disease, as indicated by a lower CSF fungal burden  
300 at baseline and a higher percentage of sterile CSF cultures at day 14. On the other hand,  
301 individuals with a CSF protein  $< 100$  mg/dL, particularly those not on ART, demonstrated a  
302 deficient or absent cell-mediated immune response, manifested by a higher CSF fungal burden at  
303 baseline, lower CSF white blood cell count, fewer sterile cultures at day 14, and higher 18-week  
304 morality. Further studies are warranted to investigate the potential of CSF protein levels as a  
305 rapid predictive tool for identifying individuals who would benefit from targeted  
306 immunomodulatory therapy to either dampen an exaggerated immune response or augment a  
307 deficient immune response.

308

## 309 **Acknowledgements.**

310 ASTRO-cm and AMBITION-cm study Team Members. Reuben Kiggundu, Andrew  
311 Akampurira, Paul Kirumira, Jane Francis Ndyetukira, Cynthia Ahimbisibwe, Florence Kugonza,  
312 Carolyn Namuju, Alisat Sadiq, Tadeo Kiiza Kandole, Tony Luggya, Julian Kaboggoza, Eva  
313 Laker, Alice Namudde, Sarah Lofgren, Richard Kwizera, Irene Rwomushana, Mike Ssemusu,  
314 Joan Rukundo, James Mwesigye, Kirsten Nielsen, Anna Stadelman, Ananta S. Bangdiwala,  
315 David Lawrence and Nabila Youssouf.

316

## 317 **Financial support.**

318 This work was supported by the National Institute of Neurologic Diseases and Stroke  
319 (R01NS086312, K23NS122601); the Fogarty International Center (K01TW010268,  
320 R25TW009345); the National Institute of Allergy and Infectious Diseases (T32AI055433);  
321 United Kingdom Medical Research Council / DfID / Wellcome Trust Global Clinical Trials  
322 (grant numbers M007413/1, MR/P006922/1); Grand Challenges Canada (S4-0296-01); and the  
323 European and Developing Countries Clinical Trials Partnership (EDCTP) (TRIA2015-1092)  
324 with assistance from the Swedish International Development Cooperation Agency (SIDA), the  
325 U.K. Department of Health and Social Care, the U.K. Foreign Commonwealth and Development  
326 Office, and the U.K. Medical Research Council.

327

## 328 **Potential conflicts of interest.**

329 All authors: no reported conflicts of interest.

## 330 **References.**

- 331 1. UNAIDS. Global HIV & AIDS statistics — Fact sheet.  
332 <https://www.unaids.org/en/resources/fact-sheet> **2021**.
- 333 2. Rajasingham R, Govender NP, Jordan A, Loyse A, Shroufi A, Denning DW, et al. The  
334 global burden of HIV-associated cryptococcal infection in adults in 2020: a modelling  
335 analysis. *Lancet Infect Dis* **2022**; 22: 1748-55.
- 336 3. Jarvis JN, Lawrence DS, Meya DB, Kagimu E, Kasibante J, Mpoza E, et al. Single-Dose  
337 Liposomal Amphotericin B Treatment for Cryptococcal Meningitis. *N Engl J Med* **2022**;  
338 386: 1109-20.
- 339 4. Rhein J, Huppler Hullsiek K, Tugume L, Nuwagira E, Mpoza E, Evans EE, et al.  
340 Adjunctive sertraline for HIV-associated cryptococcal meningitis: a randomised, placebo-  
341 controlled, double-blind phase 3 trial. *Lancet Infect Dis* **2019**; 19: 843-51.
- 342 5. Schilde LM, Kösters S, Steinbach S, Schork K, Eisenacher M, Galozzi S, et al. Protein  
343 variability in cerebrospinal fluid and its possible implications for neurological protein  
344 biomarker research. *PLoS One* **2018**; 13: e0206478.
- 345 6. Seehusen DA, Reeves MM, Fomin DA. Cerebrospinal fluid analysis. *Am Fam Physician*  
346 **2003**; 68: 1103-8.
- 347 7. Huang L, Ye H, Qu J, Liu Y, Zhong C, Tang G, et al. Analysis of cerebrospinal fluid  
348 protein concentrations of patients with cryptococcal meningitis treated with antifungal  
349 agents. *BMC Infect Dis* **2015**; 15: 333.
- 350 8. Diamond RD, Bennett JE. Prognostic factors in cryptococcal meningitis. A study in 111  
351 cases. *Ann Intern Med* **1974**; 80: 176-81.
- 352 9. Qu J, Jiang J, Lv X. The utility of cerebrospinal fluid white cell count during the  
353 prognostic assessment for cryptococcal meningitis patients: a retrospective study. *BMC*  
354 *Infect Dis* **2020**; 20: 571.
- 355 10. Bicanic T, Brouwer AE, Meintjes G, Rebe K, Limmathurotsakul D, Chierakul W, et al.  
356 Relationship of cerebrospinal fluid pressure, fungal burden and outcome in patients with  
357 cryptococcal meningitis undergoing serial lumbar punctures. *AIDS* **2009**; 23: 701-6.
- 358 11. Boulware DR, Bonham SC, Meya DB, Wiesner DL, Park GS, Kambugu A, et al. Paucity  
359 of Initial Cerebrospinal Fluid Inflammation in Cryptococcal Meningitis Is Associated  
360 with Subsequent Immune Reconstitution Inflammatory Syndrome. *Journal of Infectious*  
361 *Diseases* **2010**; 202: 962-70.
- 362 12. Jarvis JN, Bicanic T, Loyse A, Namarika D, Jackson A, Nussbaum JC, et al.  
363 Determinants of mortality in a combined cohort of 501 patients with HIV-associated  
364 Cryptococcal meningitis: implications for improving outcomes. *Clin Infect Dis* **2014**; 58:  
365 736-45.
- 366 13. Lawrence DS, Youssouf N, Molloy SF, Alanio A, Alufandika M, Boulware DR, et al.  
367 AMBIsome Therapy Induction Optimisation (AMBITION): High Dose AmBisome for

*Kasibante CSF Protein in Cryptococcosis*

- 368 Cryptococcal Meningitis Induction Therapy in sub-Saharan Africa: Study Protocol for a  
369 Phase 3 Randomised Controlled Non-Inferiority Trial. *Trials* **2018**; 19: 649.
- 370 14. Williams DA, Kiiza T, Kwizera R, Kiggundu R, Velamakanni S, Meya DB, et al.  
371 Evaluation of fingerstick cryptococcal antigen lateral flow assay in HIV-infected persons:  
372 a diagnostic accuracy study. *Clin Infect Dis* **2015**; 61: 464-7.
- 373 15. Boulware DR, Rolfes MA, Rajasingham R, von Hohenberg M, Qin Z, Taseera K, et al.  
374 Multisite validation of cryptococcal antigen lateral flow assay and quantification by laser  
375 thermal contrast. *Emerg Infect Dis* **2014**; 20: 45-53.
- 376 16. Benjamini Y, Hochberg Y. Controlling the False Discovery Rate - a Practical and  
377 Powerful Approach to Multiple Testing. *Journal of the Royal Statistical Society Series B-*  
378 *Statistical Methodology* **1995**; 57: 289-300.
- 379 17. Pullen MF, Hullsiek KH, Rhein J, Musubire AK, Tugume L, Nuwagira E, et al.  
380 Cerebrospinal Fluid Early Fungicidal Activity as a Surrogate Endpoint for Cryptococcal  
381 Meningitis Survival in Clinical Trials. *Clin Infect Dis* **2020**; 71: e45-e9.
- 382 18. Scriven JE, Graham LM, Schutz C, Scriba TJ, Wilkinson KA, Wilkinson RJ, et al. The  
383 CSF Immune Response in HIV-1-Associated Cryptococcal Meningitis: Macrophage  
384 Activation, Correlates of Disease Severity, and Effect of Antiretroviral Therapy. *J Acquir*  
385 *Immune Defic Syndr* **2017**; 75: 299-307.
- 386 19. Jarvis JN, Casazza JP, Stone HH, Meintjes G, Lawn SD, Levitz SM, et al. The phenotype  
387 of the Cryptococcus-specific CD4+ memory T-cell response is associated with disease  
388 severity and outcome in HIV-associated cryptococcal meningitis. *J Infect Dis* **2013**; 207:  
389 1817-28.
- 390 20. Jarvis JN, Meintjes G, Bicanic T, Buffa V, Hogan L, Mo S, et al. Cerebrospinal fluid  
391 cytokine profiles predict risk of early mortality and immune reconstitution inflammatory  
392 syndrome in HIV-associated cryptococcal meningitis. *PLoS Pathog* **2015**; 11: e1004754.
- 393 21. Neal LM, Xing E, Xu J, Kolbe JL, Osterholzer JJ, Segal BM, et al. CD4(+) T Cells  
394 Orchestrate Lethal Immune Pathology despite Fungal Clearance during Cryptococcus  
395 neoformans Meningoencephalitis. *mBio* **2017**; 8: pii: e01415-17.
- 396 22. Geiser T, Dewald B, Ehrenguber MU, Clark-Lewis I, Baggiolini M. The interleukin-8-  
397 related chemotactic cytokines GRO alpha, GRO beta, and GRO gamma activate human  
398 neutrophil and basophil leukocytes. *J Biol Chem* **1993**; 268: 15419-24.
- 399 23. Takatsu K, Nakajima H. IL-5 and eosinophilia. *Curr Opin Immunol* **2008**; 20: 288-94.
- 400 24. Zenobia C, Hajishengallis G. Basic biology and role of interleukin-17 in immunity and  
401 inflammation. *Periodontol 2000* **2015**; 69: 142-59.
- 402 25. Aziz N, Detels R, Chang LC, Butch AW. Macrophage Inflammatory Protein-3 Alpha  
403 (MIP-3alpha)/CCL20 in HIV-1-Infected Individuals. *J AIDS Clin Res* **2016**; 7.
- 404 26. Che YM, Zhang Y, Li M, Li XP, Zhang LL. In vitro and in vivo effect of PD-1/PD-L1  
405 blockade on microglia/macrophage activation and T cell subset balance in cryptococcal  
406 meningitis. *J Cell Biochem* **2018**; 119: 3044-57.

*Kasibante CSF Protein in Cryptococcosis*

- 407 27. Malyak M, Smith MF, Jr., Abel AA, Hance KR, Arend WP. The differential production  
408 of three forms of IL-1 receptor antagonist by human neutrophils and monocytes. *J*  
409 *Immunol* **1998**; 161: 2004-10.
- 410 28. Ross SH, Cantrell DA. Signaling and Function of Interleukin-2 in T Lymphocytes. *Annu*  
411 *Rev Immunol* **2018**; 36: 411-33.
- 412 29. Ma LL, Wang CLC, Neely GG, Epelman S, Krensky AM, Mody CH. NK cells use  
413 perforin rather than granulysin for anticryptococcal activity. *Journal of Immunology*  
414 **2004**; 173: 3357-65.
- 415 30. Zheng CF, Ma LL, Jones GJ, Gill MJ, Krensky AM, Kubes P, Mody CH. Cytotoxic  
416 CD4+ T cells use granulysin to kill *Cryptococcus neoformans*, and activation of this  
417 pathway is defective in HIV patients. *Blood* **2007**; 109: 2049-57.
- 418 31. Rohatgi S, Pirofski LA. Host immunity to *Cryptococcus neoformans*. *Future Microbiol*  
419 **2015**; 10: 565-81.
- 420 32. Tugume L, Rhein J, Hullsiek KH, Mpoza E, Kiggundu R, Ssebambulidde K, et al. HIV-  
421 Associated Cryptococcal Meningitis Occurring at Relatively Higher CD4 Counts.  
422 *Journal of Infectious Diseases* **2019**; 219: 877-83.
- 423 33. Lofgren S, Hullsiek KH, Morawski BM, Nabeta HW, Kiggundu R, Taseera K, et al.  
424 Differences in Immunologic Factors Among Patients Presenting with Altered Mental  
425 Status During Cryptococcal Meningitis. *Journal of Infectious Diseases* **2017**; 215: 693-7.
- 426 34. Pirofski LA, Casadevall A. The damage-response framework of microbial pathogenesis  
427 and infectious diseases. *Adv Exp Med Biol* **2008**; 635: 135-46.
- 428 35. Scriven JE, Rhein J, Hullsiek KH, von Hohenberg M, Linder G, Rolfes MA, et al. Early  
429 ART After Cryptococcal Meningitis Is Associated With Cerebrospinal Fluid Pleocytosis  
430 and Macrophage Activation in a Multisite Randomized Trial. *J Infect Dis* **2015**; 212: 769-  
431 78.
- 432 36. Santomasso BD, Park JH, Salloum D, Riviere I, Flynn J, Mead E, et al. Clinical and  
433 Biological Correlates of Neurotoxicity Associated with CAR T-cell Therapy in Patients  
434 with B-cell Acute Lymphoblastic Leukemia. *Cancer Discov* **2018**; 8: 958-71.
- 435



# Figure 1a

medRxiv preprint doi: <https://doi.org/10.1101/2023.12.10.23299793>; this version posted December 12, 2023. The copyright holder for this preprint (which was not certified by peer review) is the author/funder, who has granted medRxiv a license to display the preprint in perpetuity.

It is made available under a [CC-BY 4.0 International license](https://creativecommons.org/licenses/by/4.0/).

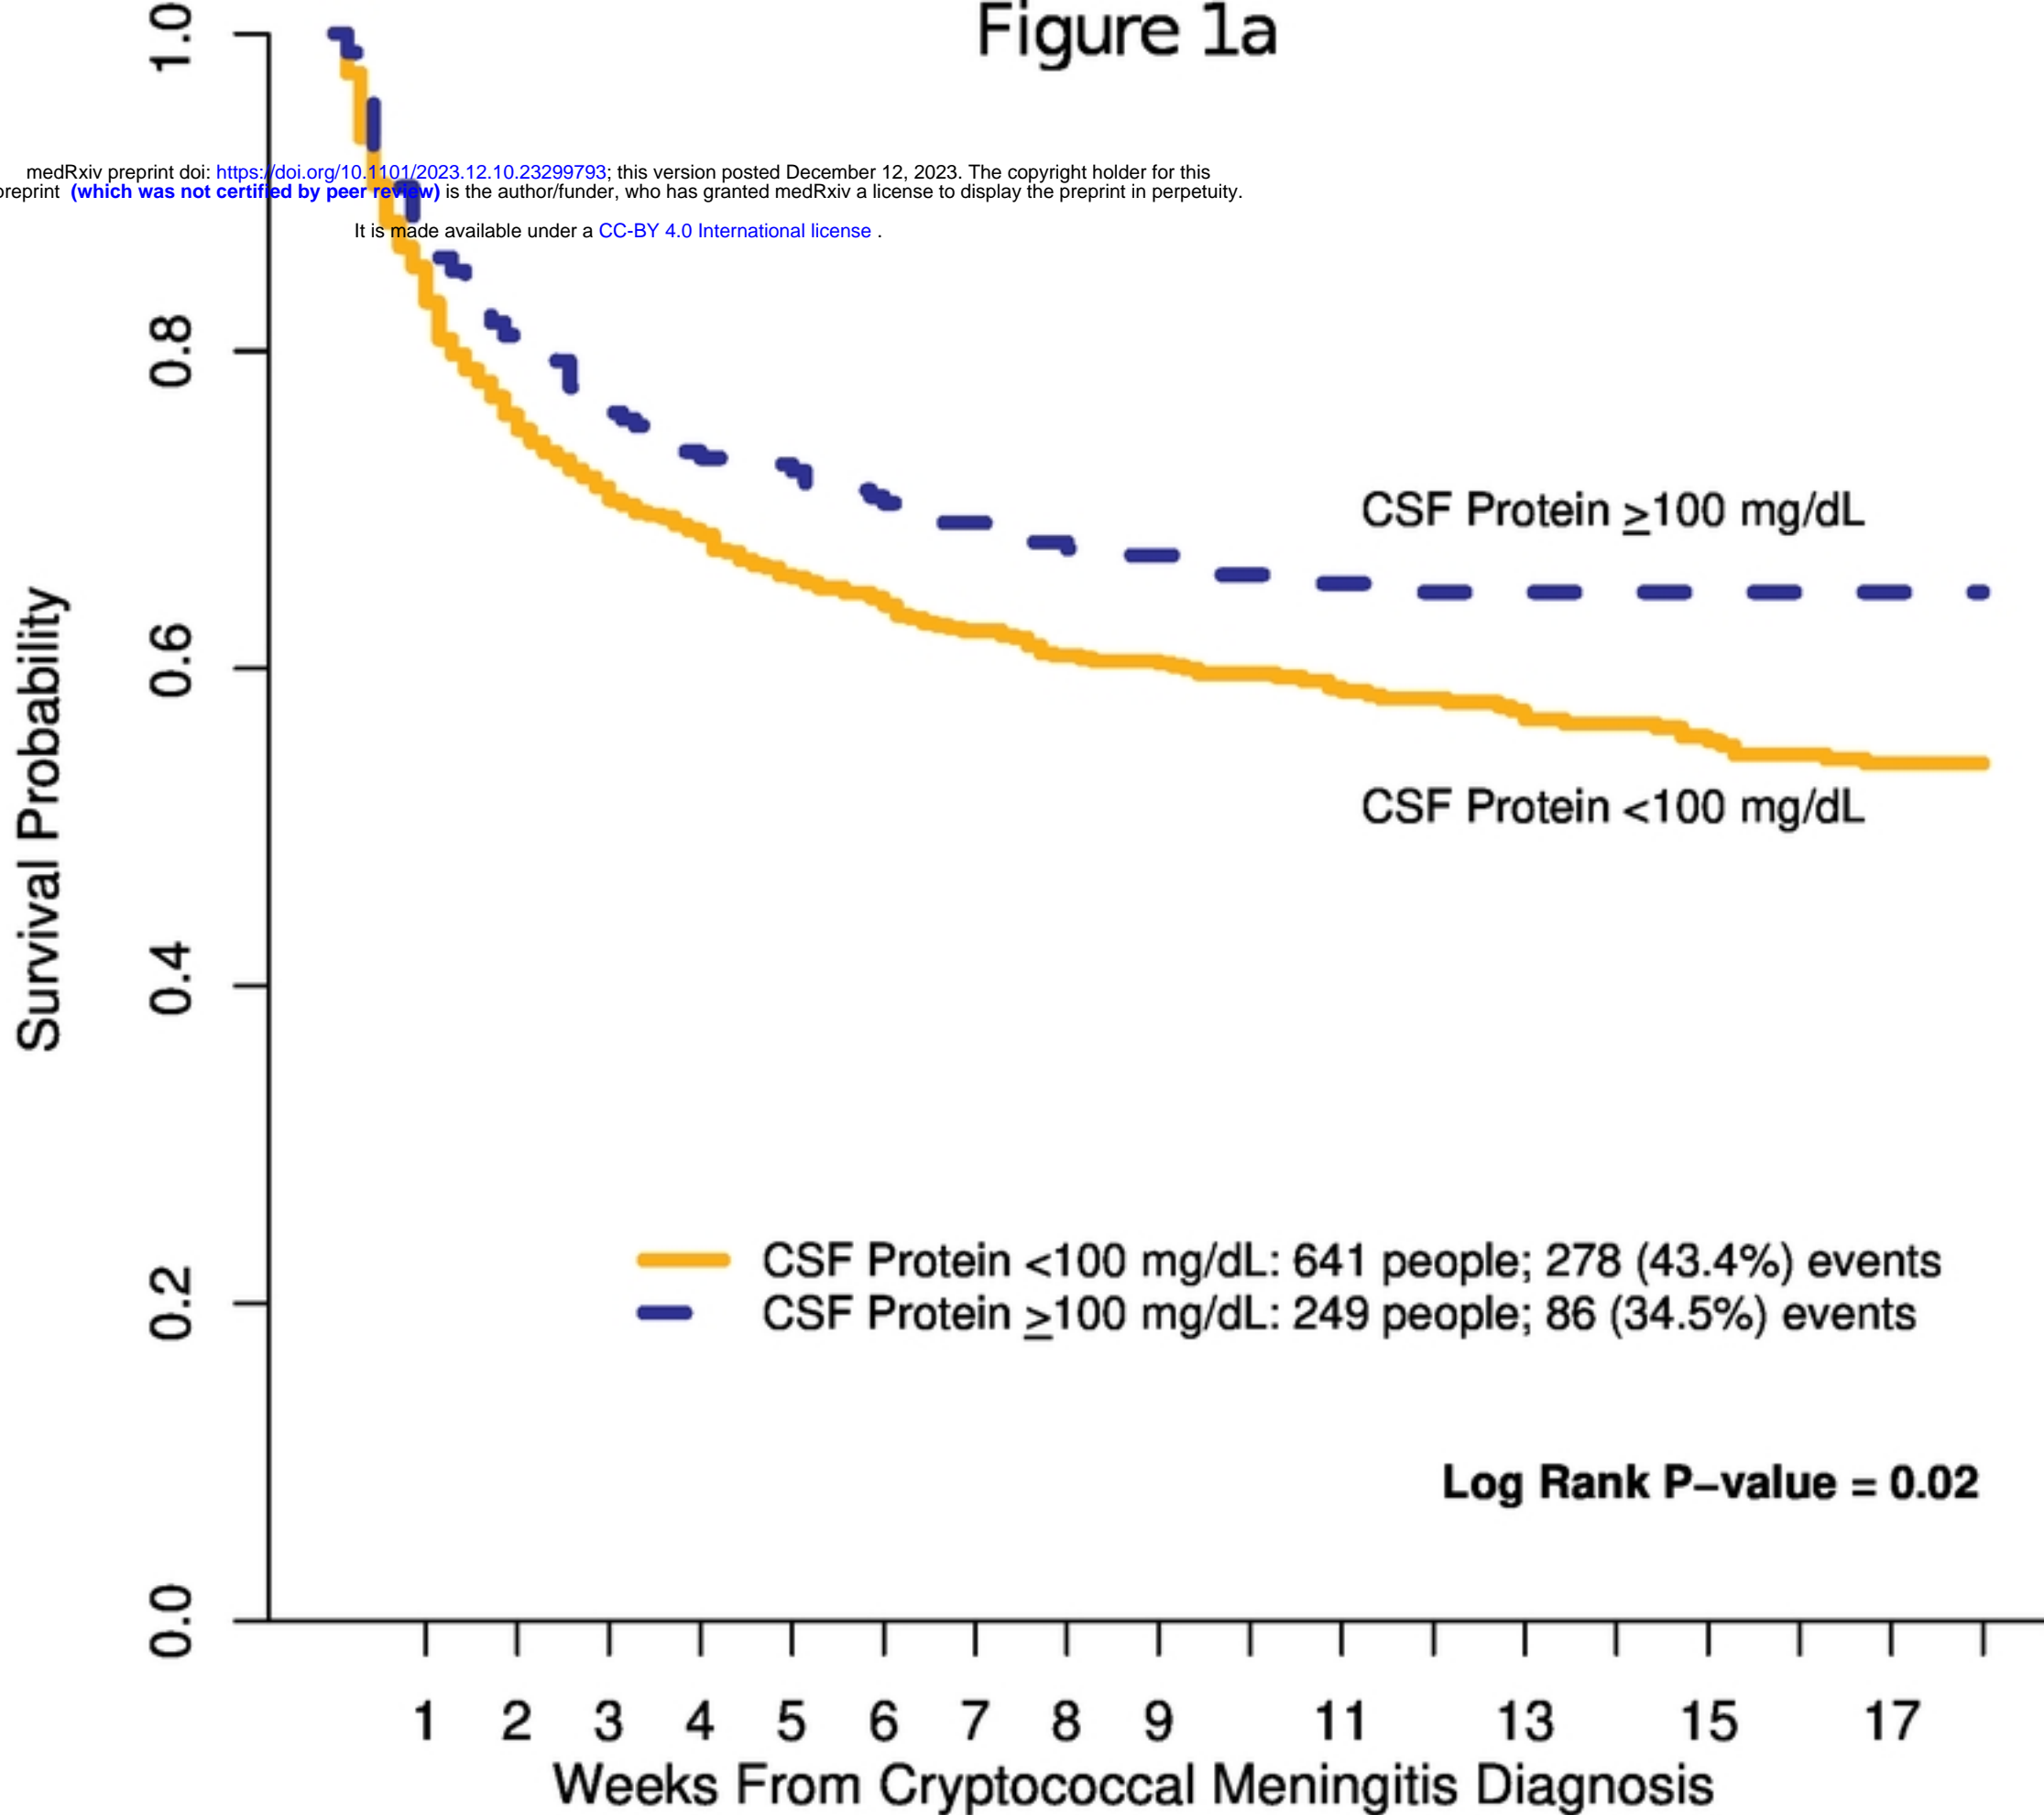

|                 |     |     |     |     |     |     |     |     |     |
|-----------------|-----|-----|-----|-----|-----|-----|-----|-----|-----|
| Number at Risk: | 641 | 481 | 435 | 406 | 382 | 372 | 241 | 207 | 194 |
|                 | 249 | 199 | 181 | 173 | 166 | 161 | 109 | 98  | 97  |

Figure 1a

Figure 1b

medRxiv preprint doi: <https://doi.org/10.1101/2023.12.10.23299793>; this version posted December 12, 2023. The copyright holder for this preprint (which was not certified by peer review) is the author/funder, who has granted medRxiv a license to display the preprint in perpetuity. It is made available under a [CC-BY 4.0 International license](https://creativecommons.org/licenses/by/4.0/).

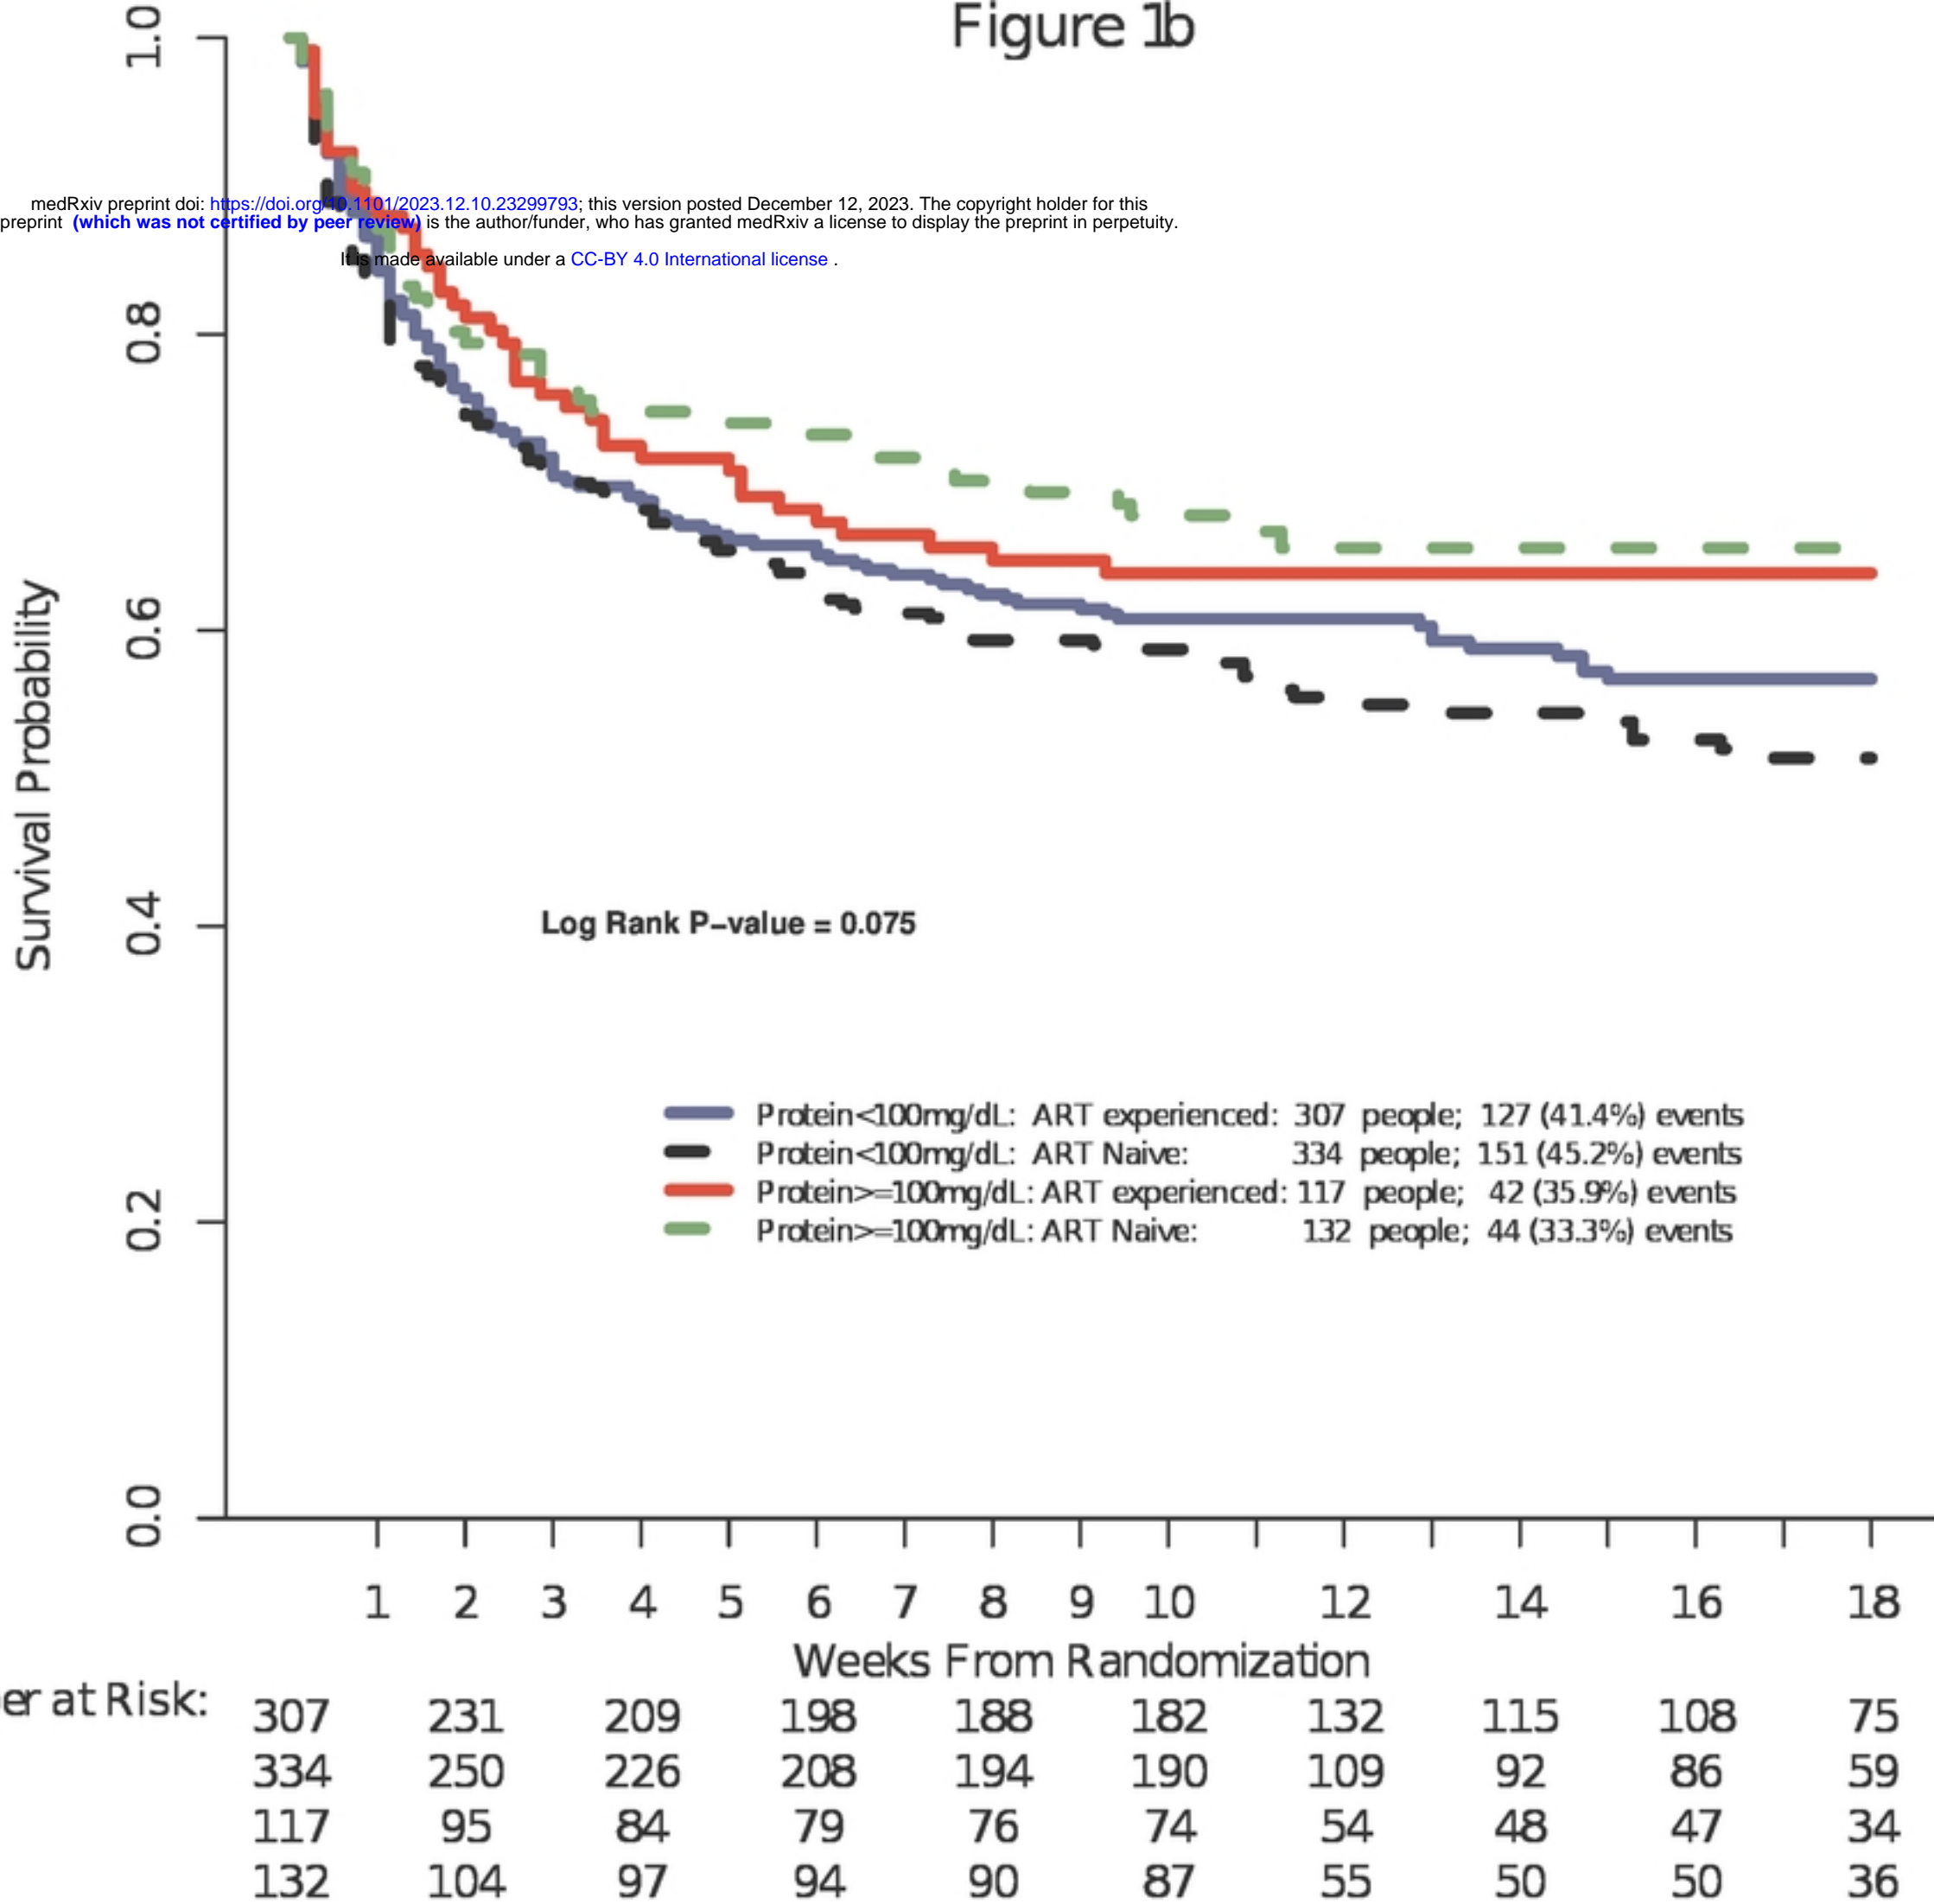

Figure 1b
